# Supplementary material
Source: PubMed Central journal article supplement (PMC4816133)
Supplement: cr2015145x1.pdf [file cr2015145x1.pdf]

## Supplementary information, Figure S1

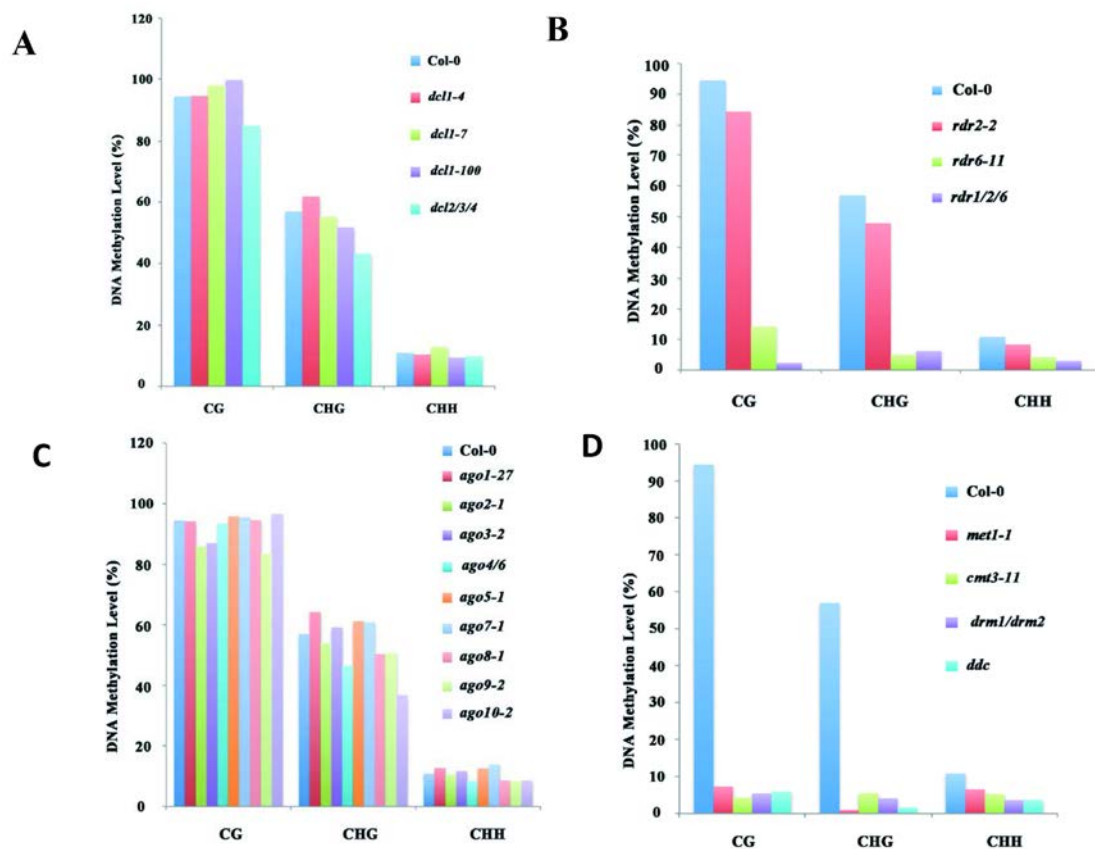

**Figure S1** DNA methylation levels at the 5' UTR region of *HEI10*. Sodium bisulfite sequencing was performed using *HEI10*-specific primers in plants of the indicated genotypes: **(A)** *dcl* mutants; **(B)** *rdr* mutants; **(C)** *ago* mutants; **(D)** DNA methyltransferase mutants. At least 15 colonies were sequenced for each sample.
