# Supplementary material
Source: PubMed Central journal article supplement (PMC4816133)
Supplement: cr2015145x2.pdf [file cr2015145x2.pdf]

## Supplementary information, Figure S2

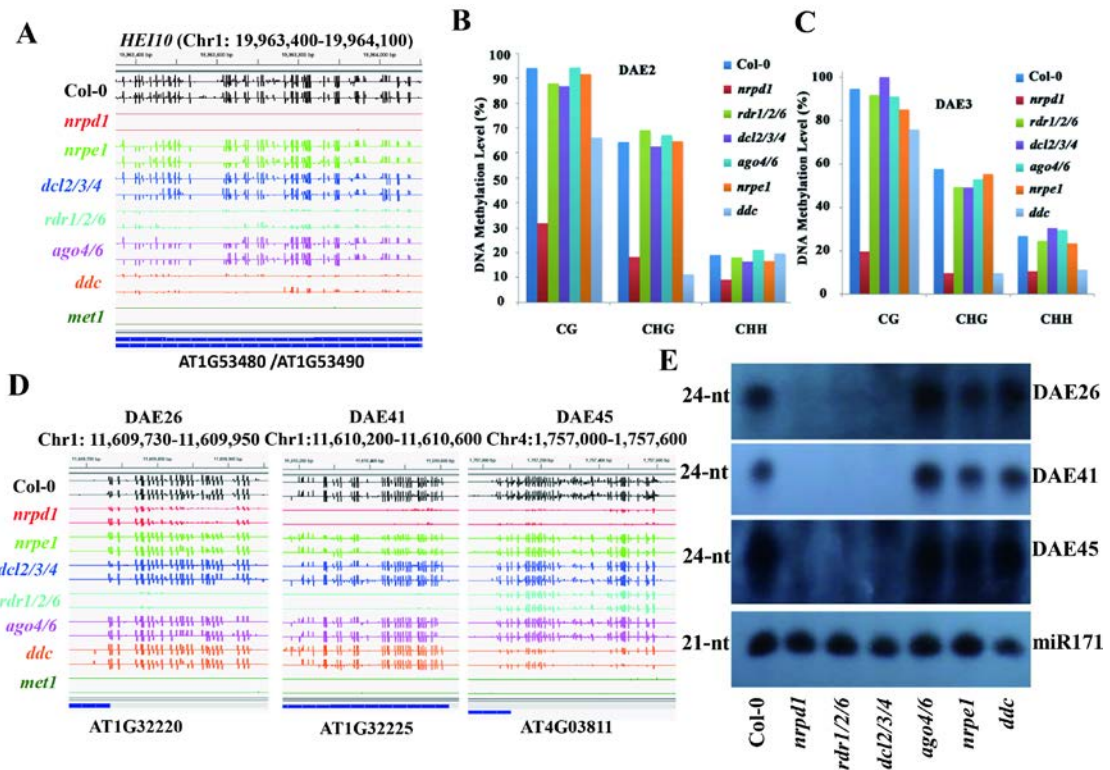

**Figure S2** DNA methylation and small RNA levels at DAE loci. **(A)** IGV genome browser screenshots showing the DNA methylation levels at *HEI10*. **(B, C)** Individual locus bisulfite sequencing to validate the DNA methylome data at DAE2 and DAE3. **(D)** IGV genome browser screenshots showing the DNA methylation levels at DAE26, DAE41 and DAE45. **(E)** Small RNA Northern analysis using DAE26-, DAE41- and DAE45-specific probes in plants of the indicated genotypes. miR171 served as a loading control.
