# Supplementary material
Source: PubMed Central journal article supplement (PMC4816133)
Supplement: cr2015145x4.pdf [file cr2015145x4.pdf]

## Supplementary information, Figure S4

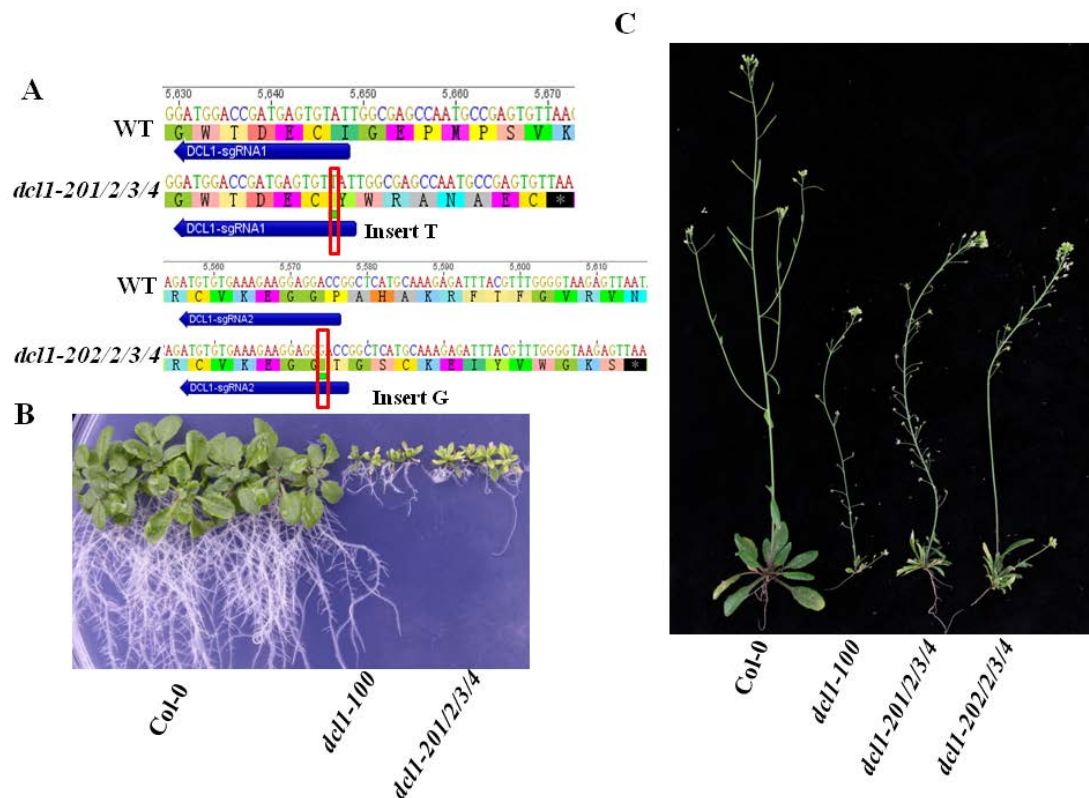

**Figure S4** Introducing *dcl1* mutations in the *dcl2/3/4* mutant. **(A)** Diagram showing the sequence of sgRNAs and the 1-nt insertion generated in *dcl1-201/dcl2/3/4* and *dcl1-202/dcl2/3/4* mutants. **(B)** Phenotype of *dcl1-201/dcl2/3/4* seedlings grown on  $\frac{1}{2}$  MS nutrient agar plates resembles that of *dcl1-100*. **(C)** Adult *dcl1/2/3/4* plants exhibit similar but slightly milder developmental defects compared to *dcl1-100*.
