# Supplementary material
Source: PubMed Central journal article supplement (PMC4816133)
Supplement: cr2015145x5.pdf [file cr2015145x5.pdf]

## Supplementary information, Figure S5

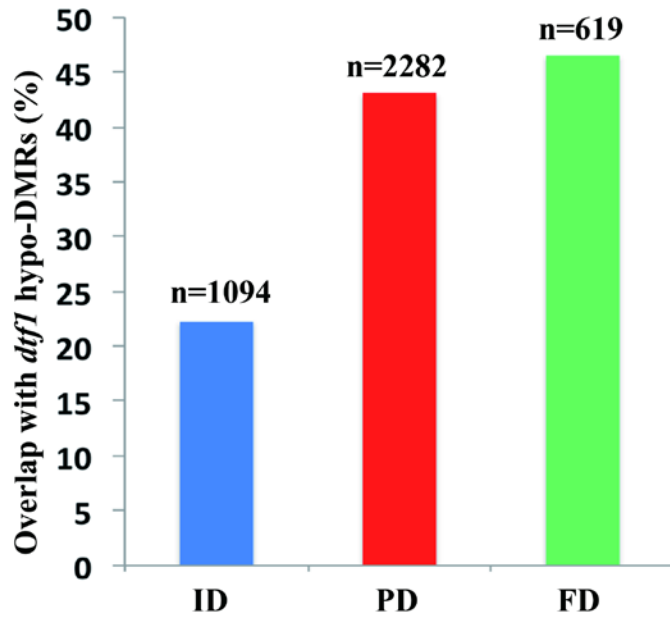

**Figure S5** Overlap between SHH1/DTF1-dependent loci and DCL-independent (ID), -partially dependent (PD) or -fully dependent (FD) RdDM loci.
