# Supplementary material
Source: PubMed Central journal article supplement (PMC4816133)
Supplement: cr2015145x6.pdf [file cr2015145x6.pdf]

## Supplementary information, Figure S6

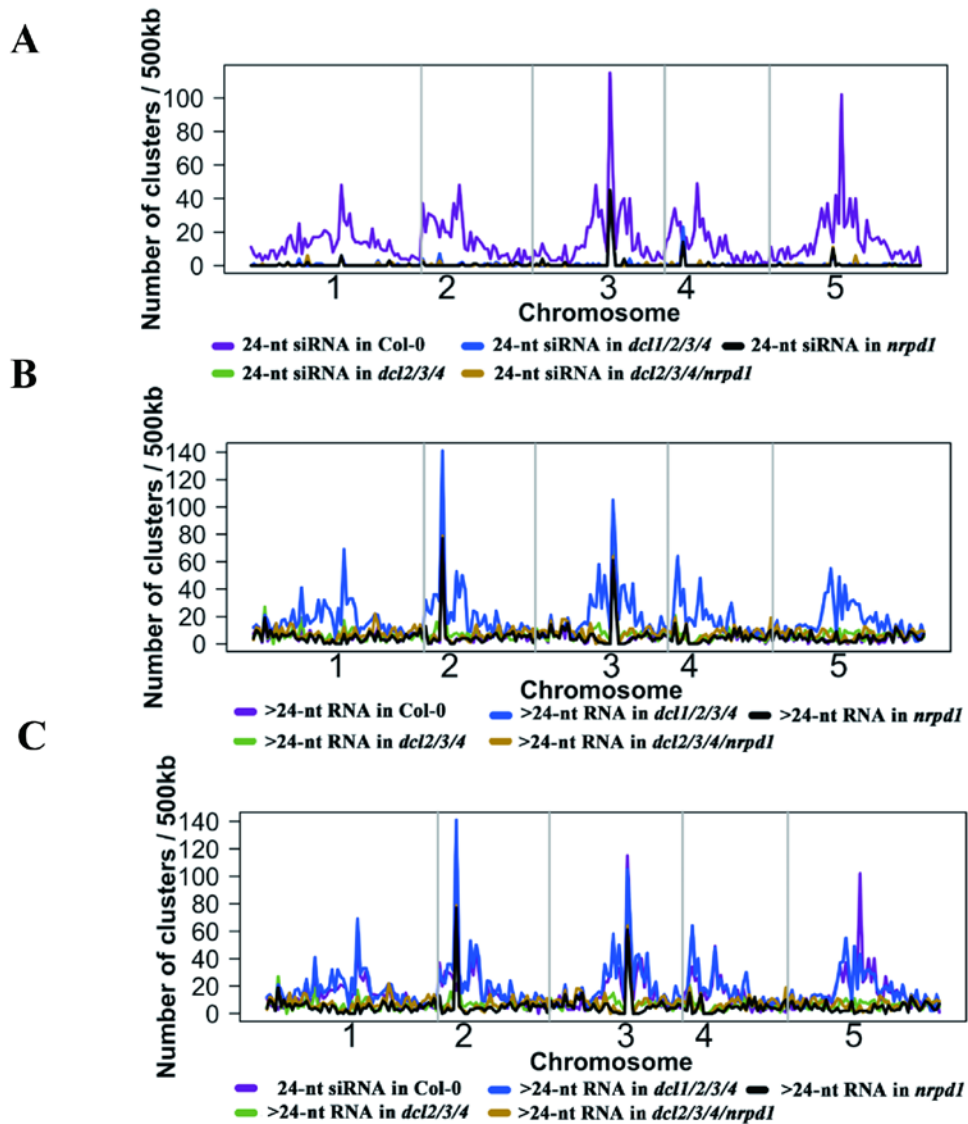

**Figure S6** The distribution of 24-nt and >24-nt RNAs on the genome. (A) The distribution of 24-nt siRNA clusters on 5 chromosomes in WT, *dcl2/3/4*, *dcl1/2/3/4* *dcl2/3/4/nprp1* and *nprp1* plants. (B) The distribution of >24-nt RNA clusters on 5 chromosomes in WT, *dcl2/3/4*, *dcl1/2/3/4*, *dcl2/3/4/nprp1* and *nprp1* plants. (C) The comparison of the distribution of 24-nt RNA clusters in WT and >24-nt RNA clusters in *dcl2/3/4*, *dcl1/2/3/4*, *dcl2/3/4/nprp1* and *nprp1* mutants.
