# Supplementary material
Source: PubMed Central journal article supplement (PMC4816133)
Supplement: cr2015145x7.pdf [file cr2015145x7.pdf]

## Supplementary information, Figure S7

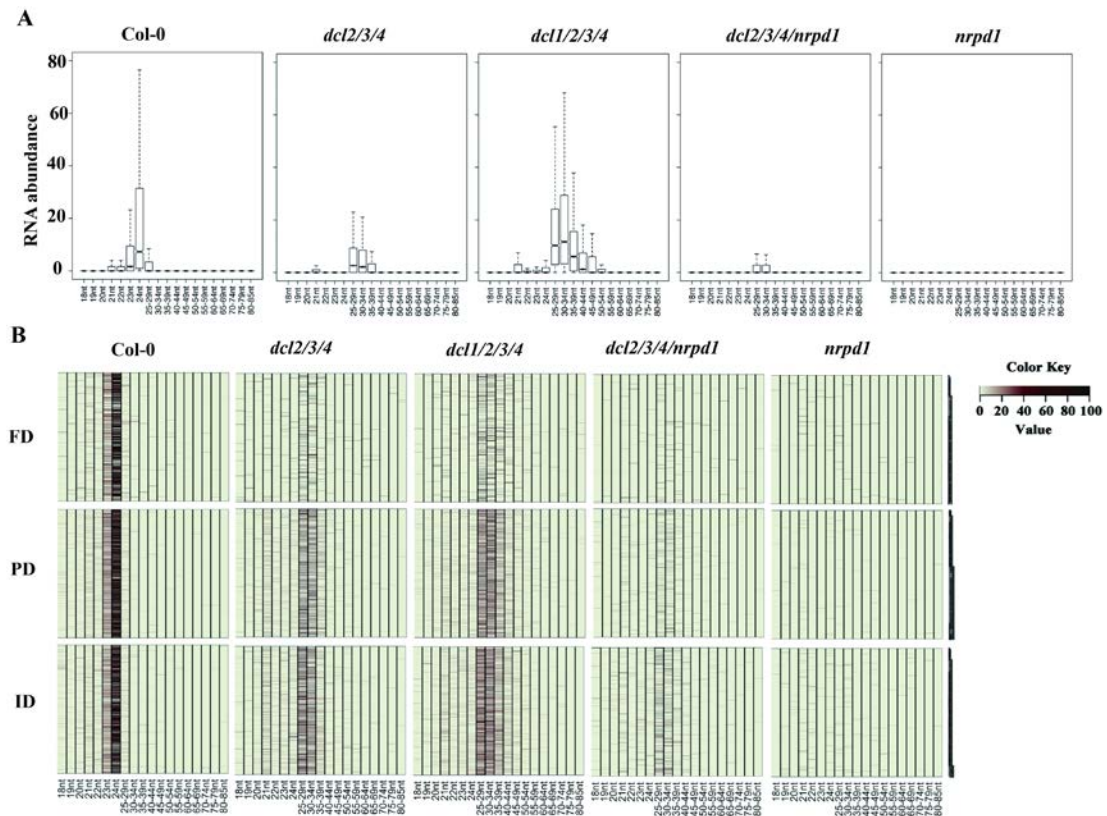

**Figure S7** Size distribution of 18-85 nt RNAs. **(A)** Box-plot indicating the RNA abundance in each genotype at small RNAs clusters that generate 25-85 nt RNAs in the *dcl1/2/3/4* mutant. **(B)** Heatmaps indicating levels of small RNAs in WT, *dcl2/3/4*, *dcl1/2/3/4*, *dcl2/3/4/nrpd1* and *nrpd1* plants at the RdDM loci where DNA methylation is fully-dependent (FD), partially-dependent (PD) or independent (ID) on DCLs.
