# Supplementary material
Source: PubMed Central journal article supplement (PMC4816133)
Supplement: cr2015145x11.pdf [file cr2015145x11.pdf]

**Table S4** List of oligos used in this study

**Bisulfite Sequencing primers**

|                    |                             |
|--------------------|-----------------------------|
| <i>HEI10</i> -BisF | gttaatatgtttgaattatgtaa     |
| <i>HEI10</i> -BisR | ccacaaaccaaatacaatcttcaa    |
| DAE2-BisF          | taagagaattttgtaaaattgttat   |
| DAE2-BisR          | caaataaaactaccaaactaaacaa   |
| DAE3-BisF          | agattaattaatttaaataagggtg   |
| DAE3-BisR          | ataccattcacatataaaactcat    |
| AT3TE24910-BisF    | tgttttgggaatgtgatagttagta   |
| AT3TE24910-BisR    | tccacataaacataaccatataaaata |
| AT1TE21210-BisF    | agtgtatggatttaattgtttaata   |
| AT1TE21210-BisR    | cttaacaattttcttataaaatcatt  |

**Probe primers**

|                       |                            |
|-----------------------|----------------------------|
| <i>HEI10</i> -Probe-F | cattaattctccatcaggagtcgtga |
| <i>HEI10</i> -Probe-R | ccctagttctctctctagtagccgc  |
| DAE2-Probe-F          | tgcaaacctgcatattccctca     |
| DAE2-Probe-R          | ggtgtgtcttcaacaacacctcca   |
| DAE3-Probe-F          | tgctcagacgaatgcgaaattaggaa |
| DAE3-Probe-R          | acttggtgggcttggtgggc       |
| DAE4-Probe-F          | gaacagccggcgacgtttcg       |
| DAE4-Probe-R          | tcgacgaacagttatgttgttcgtt  |
| DAE5-Probe-F          | gtcgtatgtctattgggaaac      |
| DAE5-Probe-R          | ggttagaagaaatctaggttc      |
| DAE15-Probe-F         | catttcgatcggagtttgatc      |
| DAE15-Probe-R         | agacaaaatcaaagacacggtcg    |
| DAE19-Probe-F         | ccgattcaattattacagaaacg    |
| DAE19-Probe-R         | attgaggagattagcccttc       |
| DAE26-Probe-F         | cgagagtaatcgtaggtaggc      |
| DAE26-Probe-R         | atcggatattcggctctga        |
| DAE41-Probe-F         | ggttccaccgtcgtaaattatg     |
| DAE41-Probe-R         | ttaccaacctacgattaggcctg    |
| DAE45-Probe-F         | gtagcttcttattaatgacgaac    |
| DAE45-Probe-R         | ttgcccttcatgccagttc        |
| AT3TE24910-Probe-F    | aggcacttgtcagggatgaggca    |
| AT3TE24910-Probe-R    | tgtccacgtaaacgtaacctgtgga  |
| AT1TE21210-Probe-F    | tggatccaatttgcccaacaaca    |
| AT1TE21210-Probe-R    | accttttagagcgtgctgataacgtg |
| miRNA171              | gatattggcgcggctcaatca      |
| miRNA173              | gtgatttctctctgtaagcga      |
| snRNA U6              | tcaccttgcgcaggggcca        |

**CRISPR/Cas9 sgRNA**

|               |                           |
|---------------|---------------------------|
| DCL1-sgRNA1-F | gattggatggaccgatgagtgtat  |
| DCL1-sgRNA1-R | aaacatacactcatcggccatcc   |
| DCL1-sgRNA2-F | gattgatgtgtgaaagaaggaggac |
| DCL1-sgRNA2-R | aaacgtcctccttcttccacatc   |
