# Supplementary material
Source: PubMed Central journal article supplement (PMC4816133)
Supplement: cr2015145x12.pdf [file cr2015145x12.pdf]

**Table S5** List of mutants used in this study

| Mutant          | ABRC name                |                                            |                                           |
|-----------------|--------------------------|--------------------------------------------|-------------------------------------------|
| <i>nRPD1-3</i>  | SALK_128428              |                                            |                                           |
| <i>nRPE1-11</i> | SALK_029919              |                                            |                                           |
| <i>rDR2-2</i>   | SALK_059661              |                                            |                                           |
| <i>rDR6-11</i>  | CS24285                  |                                            |                                           |
| <i>met1-1</i>   |                          | M.W.Kankel et al.2003                      |                                           |
| <i>cMT3-11</i>  | SALK_148381              |                                            |                                           |
| <i>dcl1-4</i>   | CS16068                  |                                            |                                           |
| <i>dcl1-7</i>   | CS3089                   |                                            |                                           |
| <i>ago1-27</i>  |                          | Morel et al.,2002                          |                                           |
| <i>ago2-1</i>   | SALK_003380              |                                            |                                           |
| <i>ago3-2</i>   | SALK_005335              |                                            |                                           |
| <i>ago5-1</i>   | SALK_063806              |                                            |                                           |
| <i>ago7-1</i>   | SALK_037458              |                                            |                                           |
| <i>ago8-1</i>   | SALK_139894              |                                            |                                           |
| <i>ago9-2</i>   | SALK_112059              |                                            |                                           |
| <i>ago10-2</i>  | SALK_047336              |                                            |                                           |
| <i>nRPB2</i>    | SALK_078769              |                                            |                                           |
| <i>dcl1-100</i> | GABI_098F10              |                                            |                                           |
| <i>ago4/6</i>   | SALK_071772, SALK_031553 | Duan et al., 2014 ( <i>ago4-6/ago6-2</i> ) |                                           |
| <i>drm1/2</i>   | SALK_021316,SALK_150863  | <i>drm1-2/drm2-2</i>                       |                                           |
| <i>dcl2/3/4</i> | CS16391                  | <i>dcl2-1/dcl3-1/dcl4-2t</i>               | SALK_064627, SALK_005512, GABI_160G05     |
| <i>rdr1/2/6</i> | CS66485                  | <i>rdr1-1/rdr2-1/rdr6-15</i>               | SAIL_672-F11, SAIL_1277_H08, SAIL_617_H07 |
| <i>ddc</i>      | CS16384                  | <i>drm1-2/drm2-2/cmt3-11</i>               | SALK_021316, SALK_150863, SALK_148381     |
